# Supplementary material for: Nifedipine Potentiates Susceptibility of Salmonella Typhimurium to Different Classes of Antibiotics
Source: MDPI journal article supplement (doi:10.3390/antibiotics10101200), 2021-10-01
Supplement: s1 [file s1]

## Supplemental Materials

### Nifedipine Potentiates Susceptibility of *Salmonella* Typhimurium to Different Classes of Antibiotics

David Haschka <sup>†</sup>, Manuel Grander <sup>†</sup>, Johannes Eibensteiner, Stefanie Dichtl, Sabine Koppelstätter and Günter Weiss <sup>\*</sup>

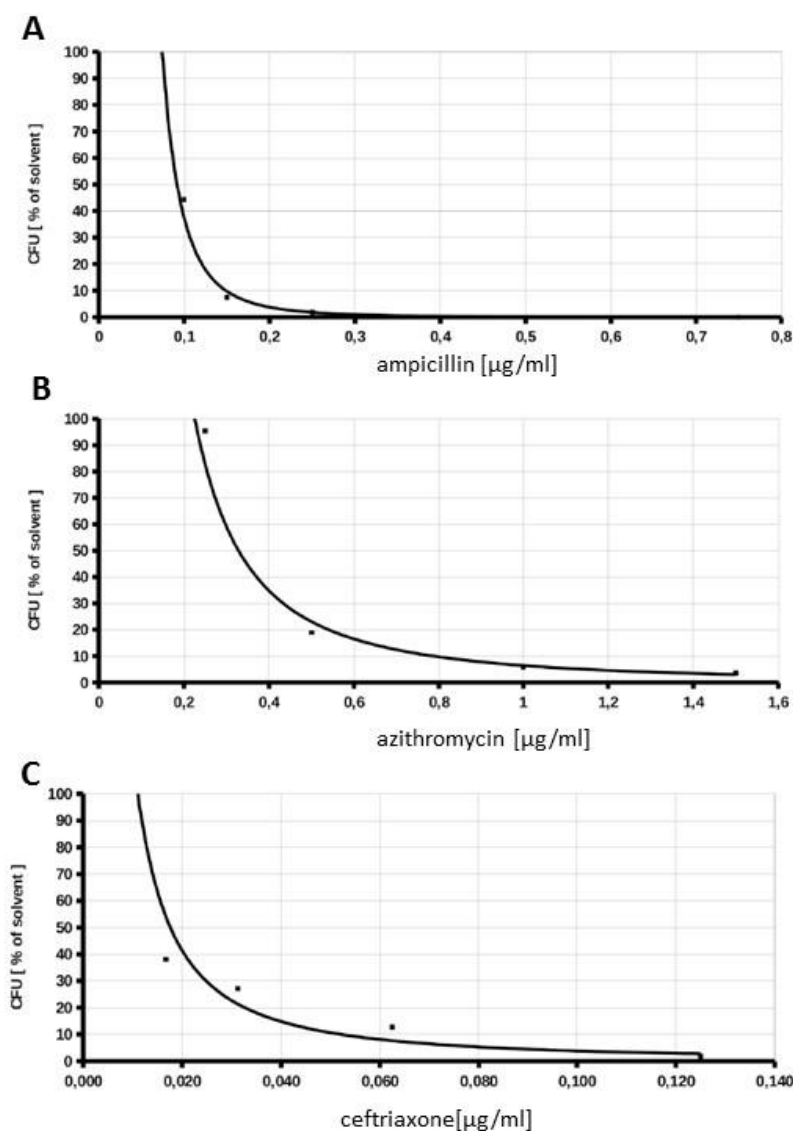

**Figure S1.** Dose-response effects of ampicillin, ceftriaxone and azithromycin on *Salmonella* survival. RAW264.7 cells were infected with *Salmonella* Typhimurium for 24 hours and treated ampicillin (A), azithromycin (B) and ceftriaxone (C) in the indicated concentrations. CFU were determined by plating on LB agar.
